# Supplementary material for: Body-temperature responsive hydrogel adhesive for active wound closure
Source: Royal Society of Chemistry journal article supplement (doi:10.1039/d5tb00084j), 2025-01-01
Supplement: d5tb00084j1.pdf [file d5tb00084j1.pdf]

## Body-temperature responsive hydrogel adhesive for active wound closure

Xiaowei Liu<sup>a, e, f</sup>, Haojie Yu<sup>\*a, b</sup>, Li Wang<sup>\*a, b</sup>, Ruixue Liang<sup>a</sup>, Yanxin Xiang<sup>e, f</sup>, Xiaohang Song<sup>e</sup>, Ying Yang<sup>c</sup>, Zhikun Huang<sup>a</sup>, Jian Yang<sup>a</sup>, Di Shen<sup>a</sup>, Yan Sheng<sup>d</sup>

<sup>a</sup> State Key Laboratory of Chemical Engineering, College of Chemical and Biological Engineering, Zhejiang University, Hangzhou 310058, P. R. China.

<sup>b</sup> Zhejiang-Russia Joint Laboratory of Photo-Electron-Magnetic Functional Materials, College of Chemical and Biological Engineering, Zhejiang University, Hangzhou 310058, P.R. China.

<sup>c</sup> State Key Laboratory for Diagnosis and Treatment of Infectious Diseases, The First Affiliated Hospital, Zhejiang University School of Medicine, Hangzhou 310003, P. R. China.

<sup>d</sup> Department of Ophthalmology, the First People's Hospital, Zhejiang University School of Medicine, Hangzhou 310024, P. R. China.

<sup>e</sup> Center for Healthcare Materials, Shaoxing Institute, Zhejiang University, Shaoxing 312099, P. R. China.

<sup>f</sup> MOE Key Laboratory of Macromolecular Synthesis and Functionalization, Department of Polymer Science and Engineering, Zhejiang University, Hangzhou, 310058, China.

Table S1 Formulations for the preparation of P(PTHF-*co*-PEG-*co*-PETMP) polymers

| Sample | PTHFDA (A) |      | PEGDA (B) |      | PETME (C) |      | DMPA (D) |      | CHCl <sub>3</sub> |
|--------|------------|------|-----------|------|-----------|------|----------|------|-------------------|
|        | mg         | mmol | mg        | mmol | mg        | mmol | mg       | mmol | ml                |

|       |       |      |       |      |      |      |      |      |     |
|-------|-------|------|-------|------|------|------|------|------|-----|
| TRP-1 | 220.2 | 0.08 | 881.5 | 0.22 | 90.3 | 0.19 | 11.1 | 0.04 | 2.2 |
| TRP-2 | 552.2 | 0.19 | 550.9 | 0.14 | 90.4 | 0.19 | 11.1 | 0.04 | 2.2 |
| TRP-3 | 752.2 | 0.26 | 350.4 | 0.09 | 90.1 | 0.18 | 11.1 | 0.04 | 2.2 |
| TRP-4 | 881.4 | 0.30 | 220.0 | 0.06 | 90.1 | 0.18 | 11.0 | 0.04 | 2.2 |

Table S2 The information of the DSC data of the polymer networks and the macromonomers

| Samples | □ PTHF phase   |                |                 | □ PEG phase    |                |                 |
|---------|----------------|----------------|-----------------|----------------|----------------|-----------------|
|         | T <sub>c</sub> | T <sub>m</sub> | ΔH <sub>m</sub> | T <sub>c</sub> | T <sub>m</sub> | ΔH <sub>m</sub> |
|         | □ (° C)        | □ (° C)        | □ (J/g)         | □ (° C)        | □ (° C)        | □ (J/g)         |
| PTHFDA  | 5.5            | 27.0           | 90.4            | --             | --             | --              |
| TRP-1   | *              | *              | *               | 25.0           | 49.9           | 72.2            |
| TRP-2   | -22.8          | 11.0           | 12.7            | 25.7           | 47.6           | 40.4            |
| TRP-3   | -10.4          | 18.7           | 24.8            | *              | 37.9           | 16.8            |
| TRP-4   | -5.2           | 20.0           | 46.2            | *              | *              | 3.6             |
| PEGDA   | □ --           | □ --           | □ --            | □ 39.7         | □ 57.0         | □ 165.0         |

\* The T<sub>c</sub> or T<sub>m</sub> was not clearly observed on the DSC curve.

Table S3 Strain values of different polymers obtained from DMA curves

| Sample | ε <sub>max</sub> (%) | ε (%) | ε <sub>residue</sub> (%) | R <sub>f</sub> (%) | R <sub>r</sub> (%) |
|--------|----------------------|-------|--------------------------|--------------------|--------------------|
| TRP-1  | 0.56                 | 0.34  | -1.02                    | 60.71              | -1.02              |
| TRP-2  | 1.67                 | 1.05  | 0.34                     | 62.87              | 42.51              |
| TRP-3  | 85.23                | 82.14 | 8.03                     | 96.37              | 86.95              |
| TRP-4  | 88.22                | 86.31 | 6.13                     | 97.83              | 90.88              |

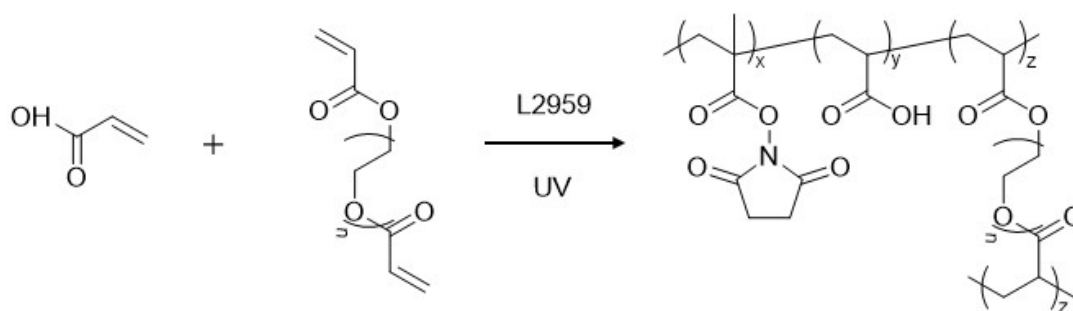

Figure S1 Reaction equation for the preparation of PSA-NHS hydrogels.

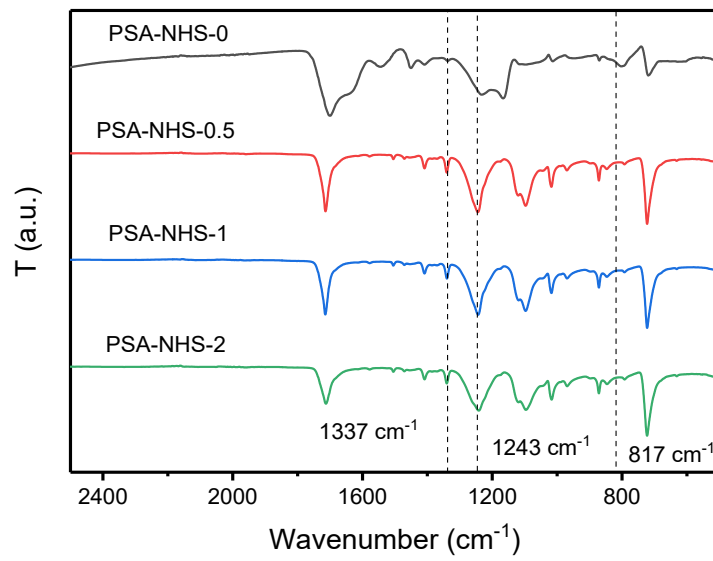

Figure S2 The FTIR spectra of PSA-NHS hydrogels with different NHS ester concentrations.

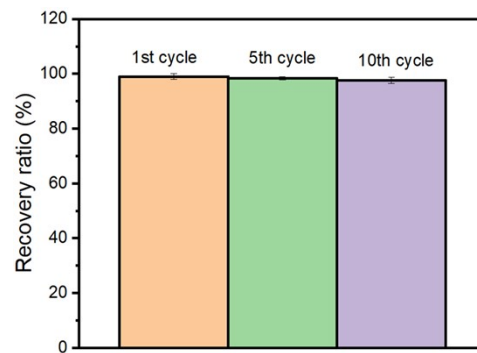

Figure S3 The recovery ratio after various shape memory cycles.

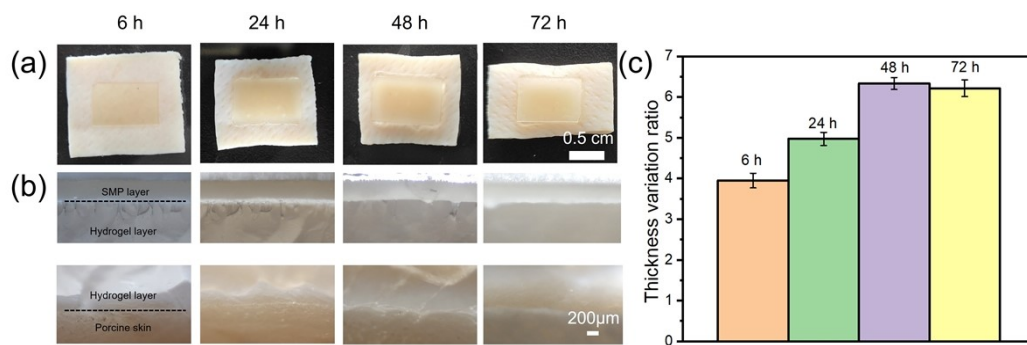

Figure S4 (a) The top view and sided view of TRAT adhesion to porcine skin after soaking in PBS for various times, and corresponding thickness variation ratio (c).

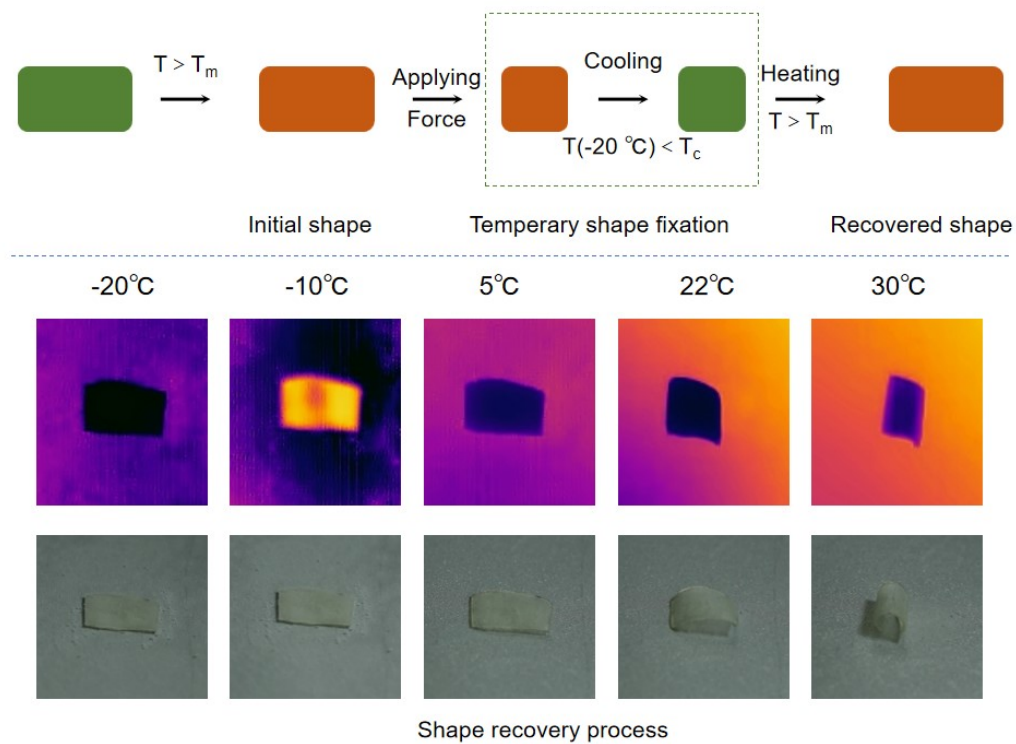

Figure S5 The shape recovery of TRAP responding to increasing temperature.

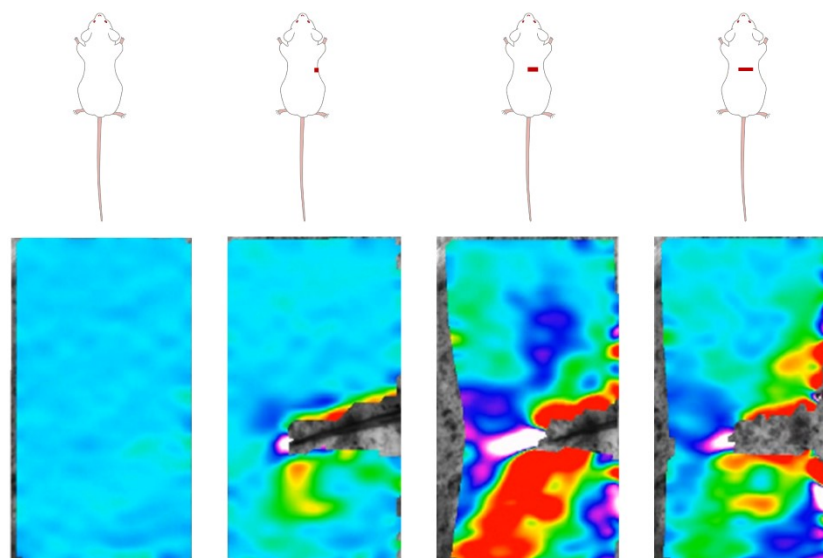

Figure S6 The strain distribution image during scratching a rat's back skin.

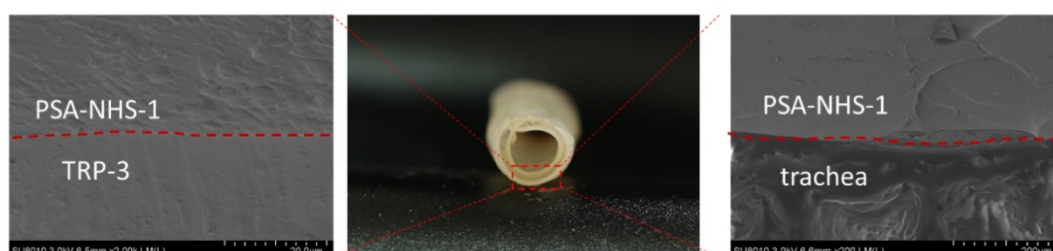

Figure S7 The SEM images after implantation of TRAT to bronchia.

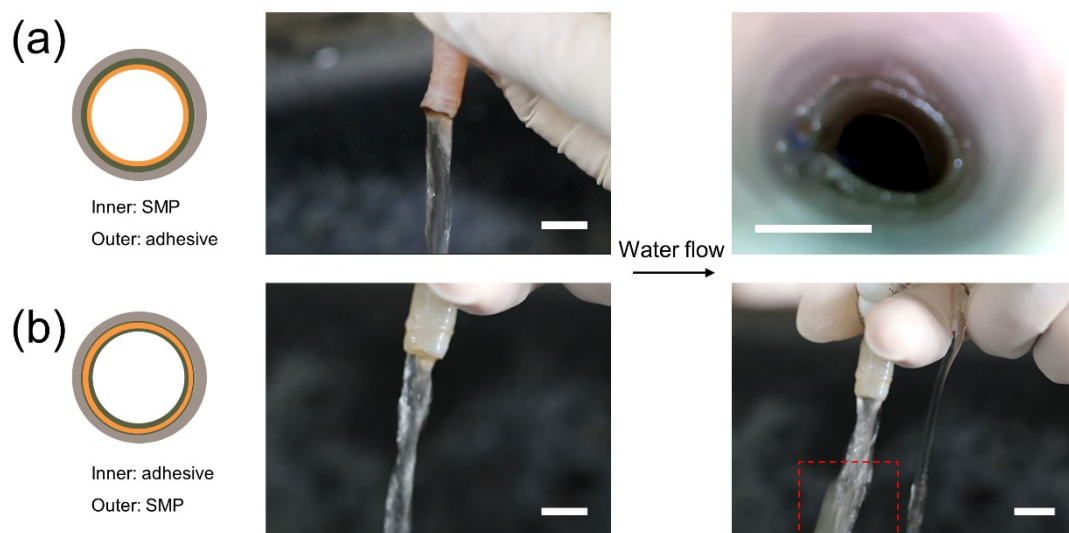

Figure S8 (a) TRAT still adhesion to inter wall even after water flowing while (b) the inverse TRAT was brought out by the water flow. Scale bar: 1 cm.

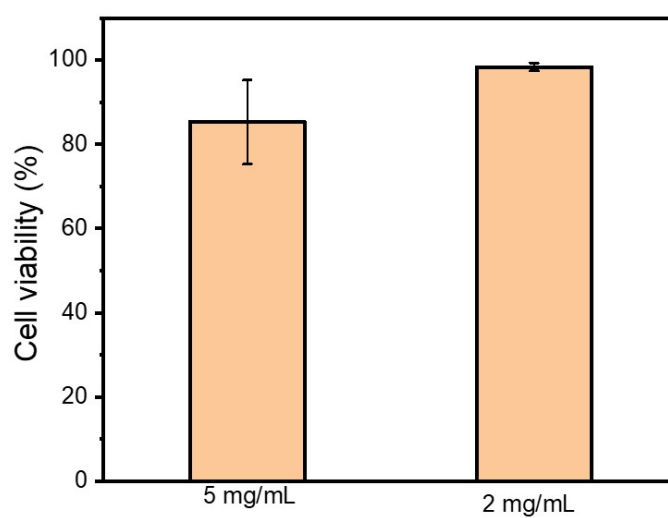

Figure S9 The cell viability of TRAT.
